# Supplementary material for: Hydrography and circulation in the vicinity of the central Getz Ice Shelf: two years of mooring observations
Source: Copernicus journal article supplement (doi:10.5194/os-2022-13), 2022-03-01

**Seasonal cycle + high frequency signal with seasonal differences**

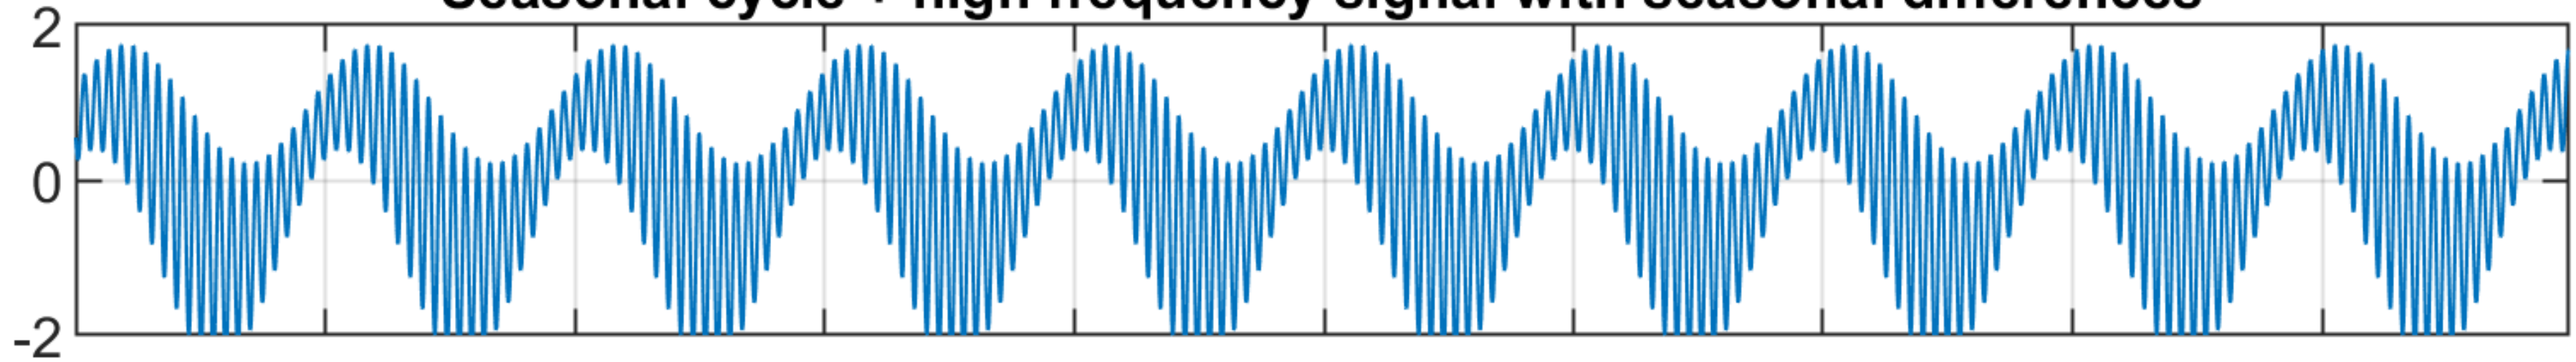

**Signal above bandpass filtered: 8D-10M**

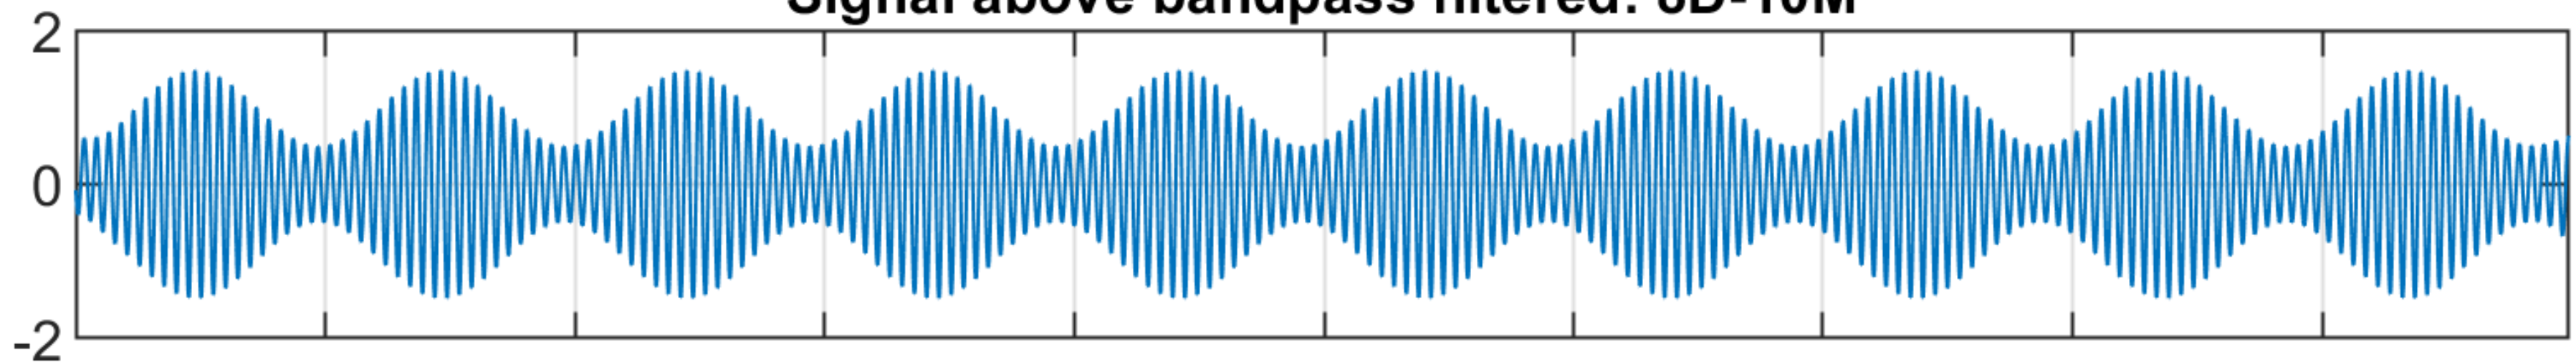

**The bandpass filtered signal - the high frequency signal**

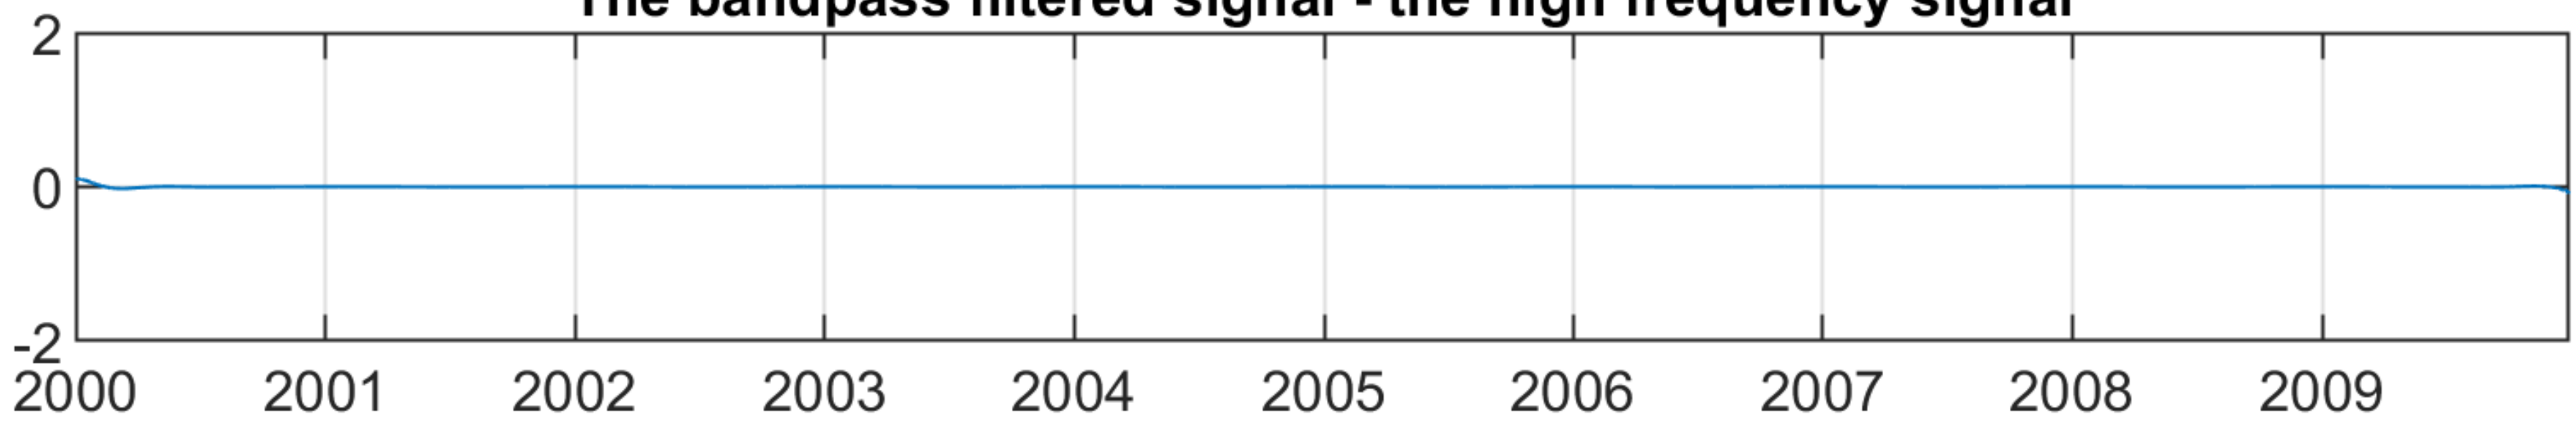

Supplement: Supplementary file [file os-2022-13-AC1-supplement.pdf]
